# Supplementary material for: A Fully Integrated Paper-Microfluidic Electrochemical Device for Simultaneous Analysis of Physiologic Blood Ions
Source: PubMed Central journal article supplement (PMC5796313; doi:10.3390/s18010104), 2018-01-01
Supplement: sensors-18-00104-s001.pdf [file sensors-18-00104-s001.pdf]

# **A Fully Integrated Paper-Microfluidic Electrochemical Device for Simultaneous Analysis of Physiologic Blood Ions**

**Joon-Hyung Jin**<sup>1</sup>, **Joon Hyub Kim**<sup>2</sup>, **Sang Ki Lee**<sup>2</sup>, **Sam Jin Choi**<sup>3</sup>, **Chan Won Park**<sup>4,\*</sup> and **Nam Ki Min**<sup>2,\*</sup>

<sup>1</sup> Department of Chemical Engineering, Kyonggi University, 154-42 Gwanggyosan-ro, Yeongtong-gu, Suwon-si, Gyeonggi-do 16227, Korea; jjh1023@kgu.ac.kr

<sup>2</sup> Department of Control and Instrumentation Engineering, Korea University, 2511 Sejong-ro, Sejong City 339-770, Korea; kim4539@korea.ac.kr (J.H.K.); snagki0@korea.ac.kr (S.K.L.)

<sup>3</sup> Department of Biomedical Engineering, College of Medicine, Kyung Hee University, Seoul 130-701, Korea; medchoi@khu.ac.kr

<sup>4</sup> Department of Electrical and Electronic Engineering, Kangwon National University, Chuncheon 200-701, Korea

\* Correspondence: cwpark@kangwon.ac.kr (C.W.P.); nkmin@korea.ac.kr (N.K.M.)

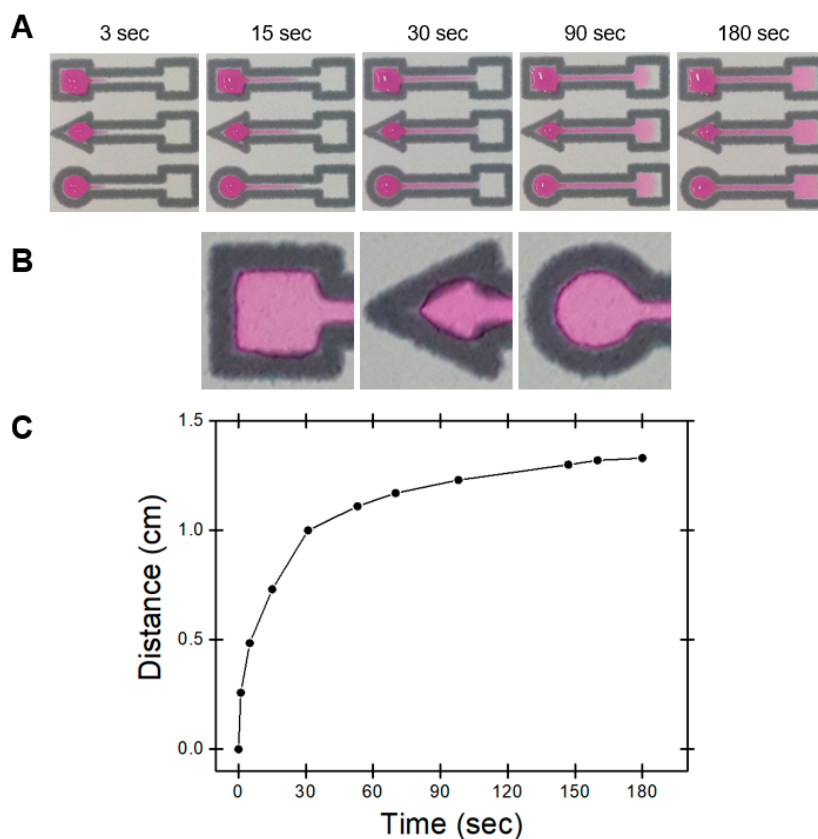

**Figure S1.** Photo images showing the different fluid loading patterns but the similar flow rates (channel length = 10 mm) (A), and the coffee effect in the patterns (B). (C) A plot of fluid flow distance as a function of time. Note that a universal indicator solution for pH measurement is used to clearly see the solution flow with naked eye.

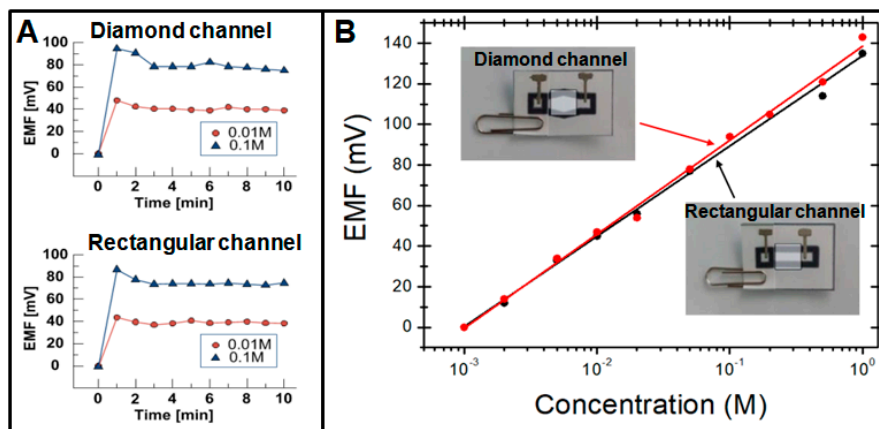

**Figure S2.** Dependence of EMF on the shape of the electrolyte mixing channel at various concentrations ( $10^{-3}$ ~ $10^0$  M KCl) of the sample solutions. Note that injection volumes of reference and sample solutions are 5  $\mu$ L, and the reference solution is  $10^{-3}$  M KCl.

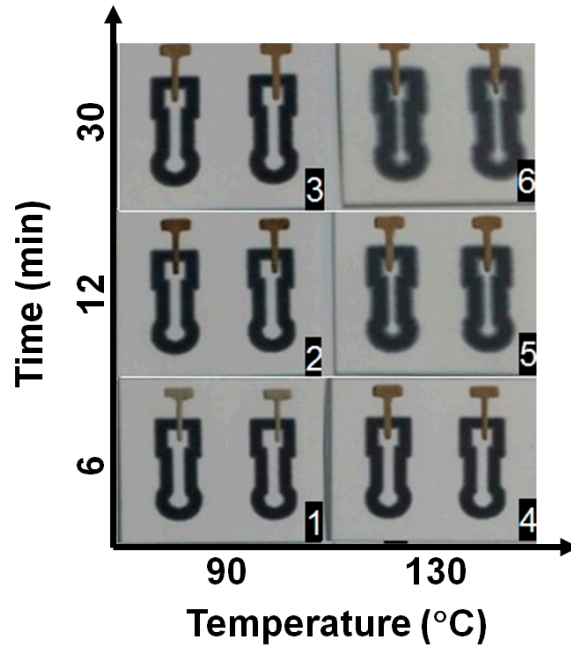

**Figure S3.** Photo images of sample and reference solution channels prepared at conditions 1 (90 °C, 6 min), 2 (90 °C, 12 min), 3 (90 °C, 30 min), 4 (130 °C, 6 min), 5 (130 °C, 12 min), and 6 (130 °C, 30 min). Note that line pattern shown in this figure is designed exclusively for optimization of heating and drying processes for wax diffusion.

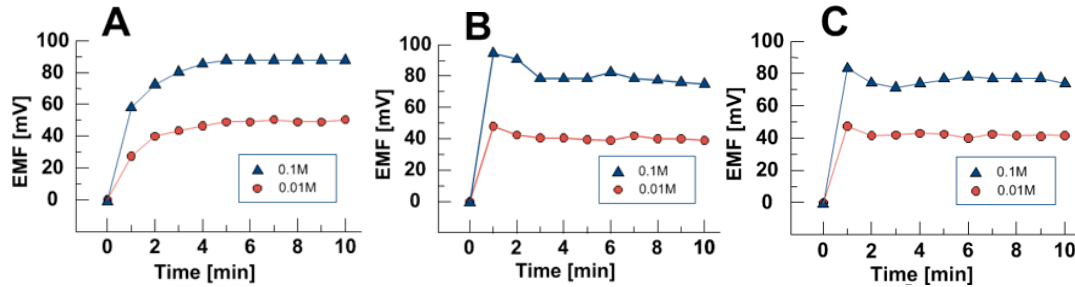

**Figure S4.** EMF characteristics of (a) non-treated, (b) oxygen plasma-treated, and (c) APDMES-treated micro channels. Note that  $10^{-1}$  M or  $10^{-2}$  M KCl solutions are loaded through a circular inlet.

**Table S1.** Summary of reagents used for preparing each ion selective membrane.

| Target ion       | Reagents                                                   | Weight percent | Weight or volume |
|------------------|------------------------------------------------------------|----------------|------------------|
| K <sup>+</sup>   | Potassium ionophore I                                      | 1.5 wt%        | 14 mg            |
|                  | Potassium tetrakis(4-chlorophenyl)borate                   | 0.5 wt%        | 3 mg             |
|                  | Polyvinyl chloride (PVC, high molecular weight)            | 33 wt%         | 328 mg           |
|                  | 2-Nitrophenyl octyl ether (NPOE)                           | 65 wt%         | 0.63 mL          |
| Na <sup>+</sup>  | 4-tert-Butylcalix[4]arenetetraacetic acid tetraethyl ester | 1 wt%          | 9.9 mg           |
|                  | Potassium tetrakis(4-chlorophenyl)borate                   | 0.5 wt%        | 2.5 mg           |
|                  | Polyvinyl chloride (PVC, high molecular weight)            | 33 wt%         | 329 mg           |
|                  | 2-Nitrophenyl octyl ether (NPOE)                           | 65.5 wt%       | 0.63 mL          |
| Ca <sup>2+</sup> | N,N,N',N'-tetracyclohexyl-3-oxapentanediamide              | 1 wt%          | 10 mg            |
|                  | Potassium tetrakis(4-chlorophenyl)borate                   | 0.5 wt%        | 6 mg             |
|                  | Polyvinyl chloride (PVC, high molecular weight)            | 33 wt%         | 328 mg           |
|                  | 2-Nitrophenyl octyl ether (NPOE)                           | 65.5 wt%       | 0.63 mL          |
